# Supplementary material for: Macro- and microplastics affect cold-water corals growth, feeding and behaviour
Source: PubMed Central journal article supplement (PMC6192985; doi:10.1038/s41598-018-33683-6), 2018-10-17
Supplement: 41598_2018_33683_MOESM1_ESM.pdf [file 41598_2018_33683_MOESM1_ESM.pdf]

1 Macro- and microplastics affect cold-water corals growth, feeding and behaviour

2  
3 Chapron L.<sup>1</sup>, Peru E.<sup>1</sup>, Engler A.<sup>1</sup>, Ghiglione J.F.<sup>2</sup>, Meistertzheim A.L.<sup>2</sup>, Pruski A. M.<sup>1</sup>, Purser A.<sup>3</sup>, Vétion G.<sup>1</sup>,  
4 Galand P. E.<sup>1</sup>, Lartaud F.<sup>1\*</sup>

5  
6 **Supplementary figures**

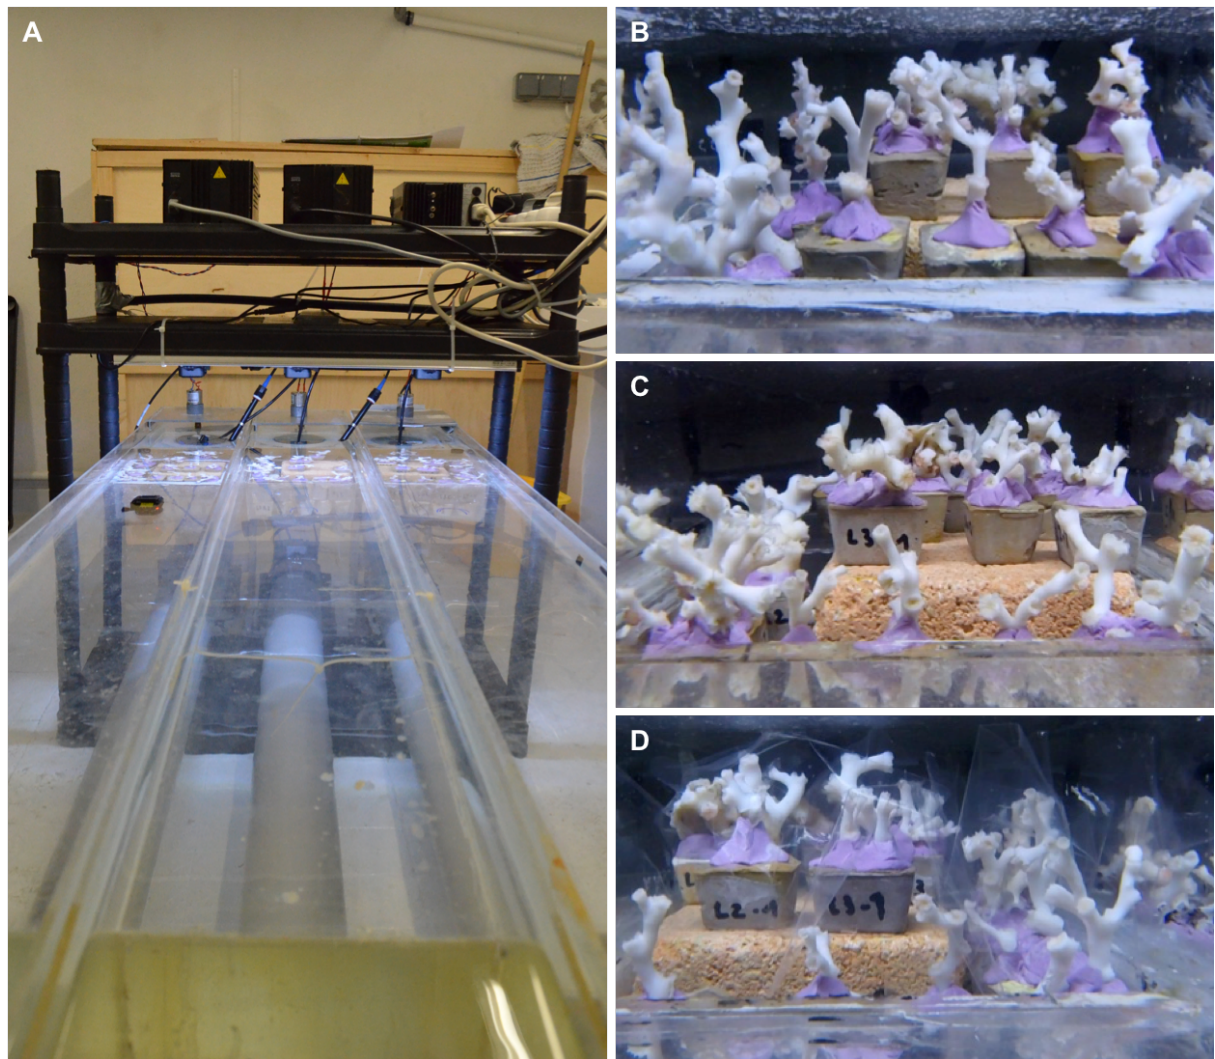

9 Figure S1: Recirculated flumes used for the experiment (A) and *L. pertusa* nubbin under different experimental  
10 conditions: (B) microplastics, (C) control and (D) macroplastic.

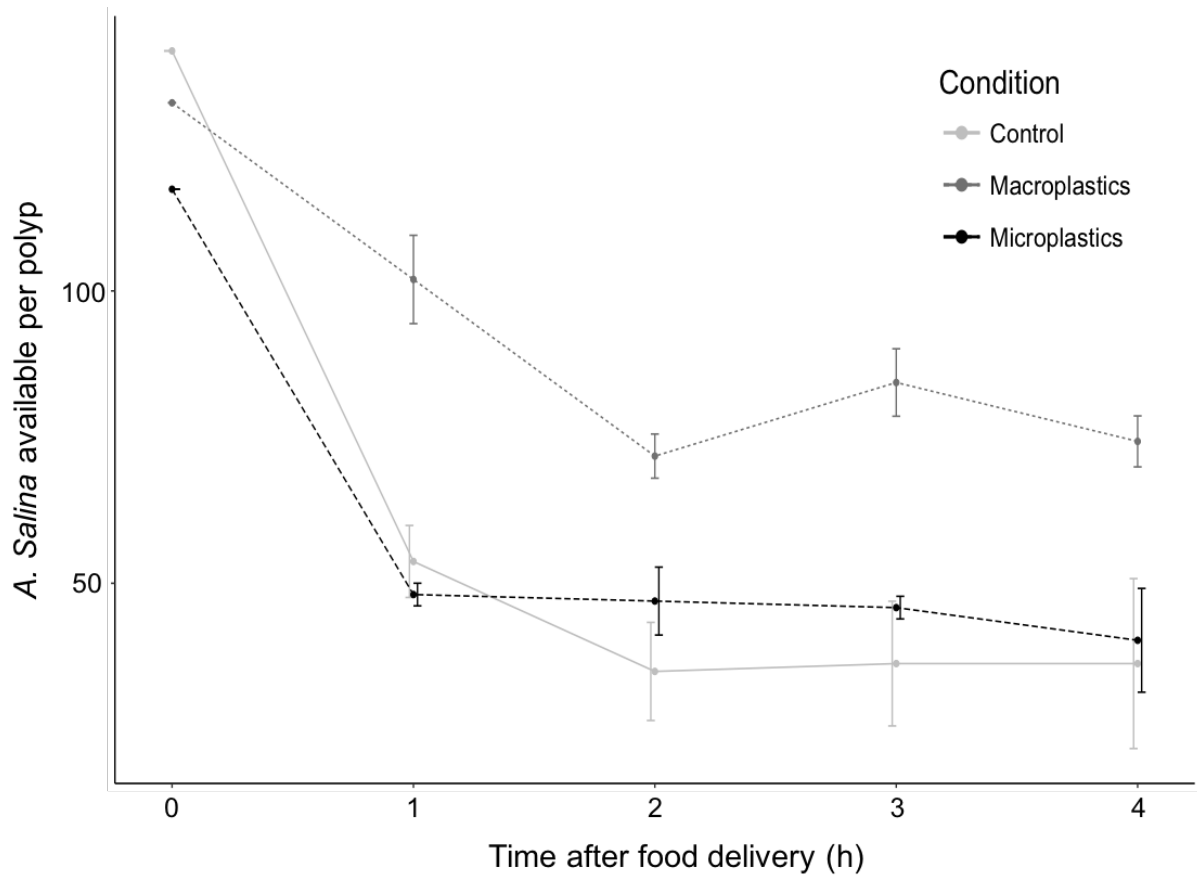

12

13 Figure S2: *A. salina* available per polyp for *L. pertusa* during four hours following feeding under each  
 14 experimental condition (control, microplastics, macroplastics).

15

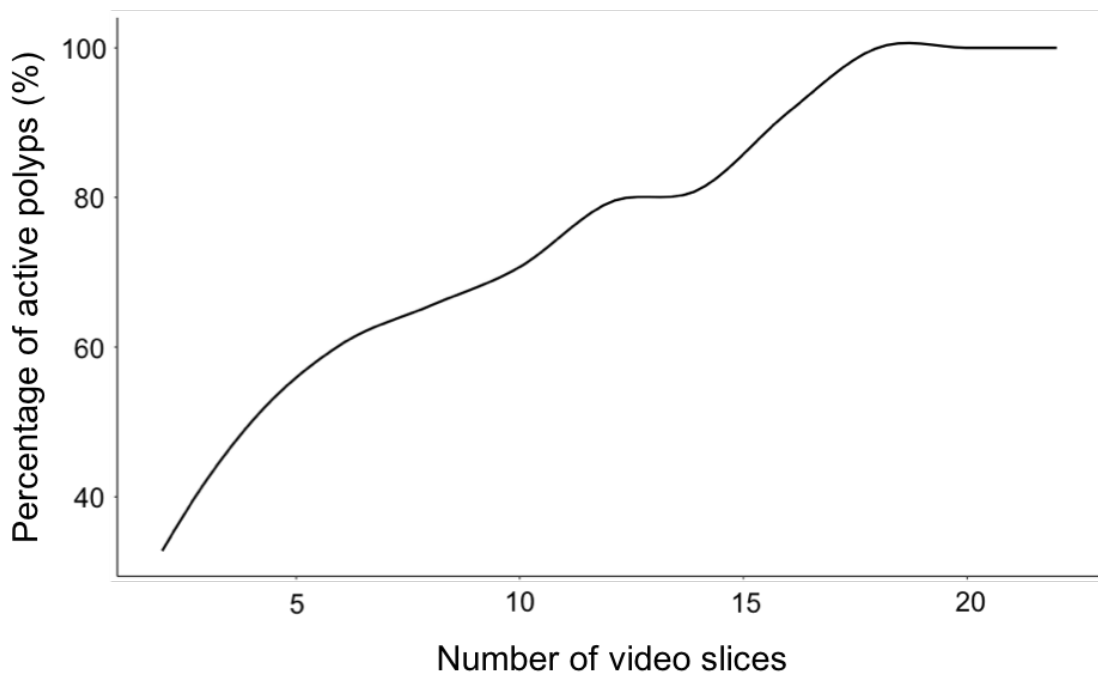

16

17 Figure S3: Percentage of actives *L. pertusa* polyps in relation to the number of video slices selected within the

18 video filmed for 2 hours after feeding.

19

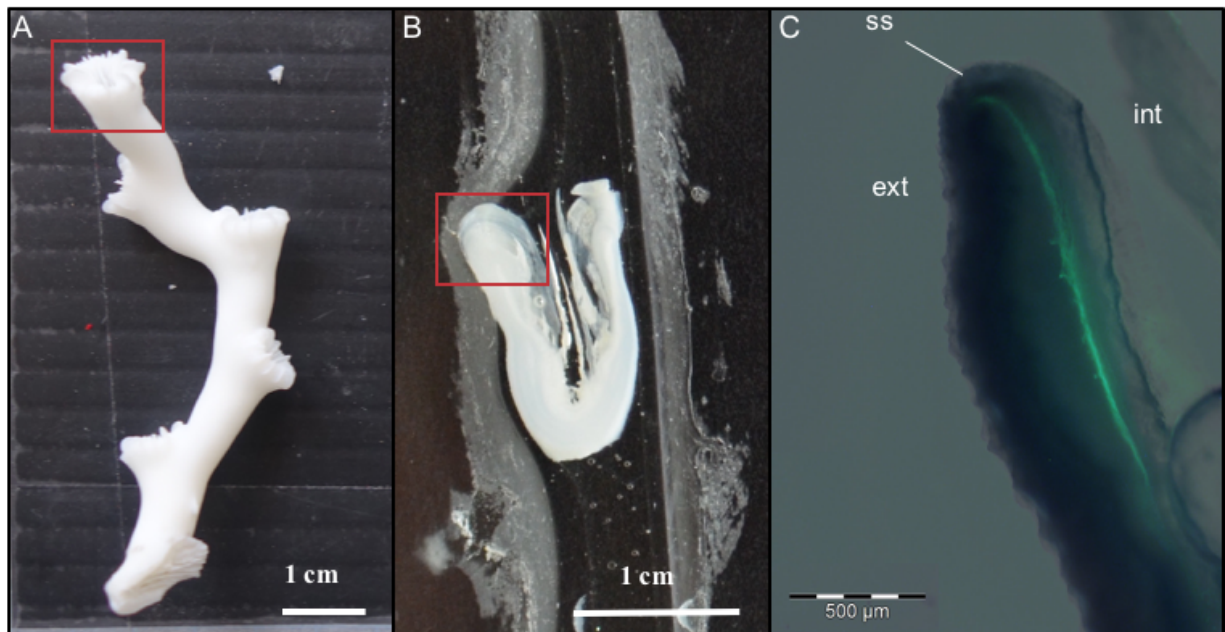

20

21 Figure S4: (A) Fragment of *L. pertusa* containing five polyps with (B) the highest one (red scare) cut into a  
22 section mounted on slide of which (C) a major septum (red scare) is observed under fluorescence revealing the  
23 calcein staining (green line). ext = extern, int = inside the polyp, ss = summit of the septum.
